# Supplementary material for: Prescription and Dispensation of QT-Prolonging Medications in Individuals Receiving Hemodialysis
Source: PubMed Central journal article supplement (PMC11061769; doi:10.1001/jamanetworkopen.2024.8732), 2024-04-30
Supplement: jamanetwopen-e248732-s001.pdf [file jamanetwopen-e248732-s001.pdf]

## Supplemental Online Content

Wang V, Wang CH, Assimon MM, Pun PH, Winkelmayr WC, Flythe JE. Prescription and dispensation of QT-prolonging medications in individuals receiving hemodialysis. *JAMA Netw Open*. 2024;7(4):e248732. doi:10.1001/jamanetworkopen.2024.8732

**eFigure.** Cohort Sampling Scheme

**eTable 1.** Data Sources: Diagnosis Codes, Data Files for Social Factors, Comorbid Conditions, and Health Care Utilization

**eTable 2.** List of QT-Prolonging Medications With a Known, Possible, and Conditional Risk of TdP

**eTable 3.** Most Frequent QT-Prolonging Medications With Known TdP Risk Filled in 2019

**eTable 4.** Medications in CYP Inhibitor Classes

**eTable 5.** QT-Prolonging Medication Use in 2019

**eTable 6.** Pharmacy and Prescriber Characteristics of the Most Common Study Pharmacokinetic Medications Interacting With New-Use Escitalopram in 2019

This supplemental material has been provided by the authors to give readers additional information about their work.

**eFigure. Cohort Sampling Scheme**

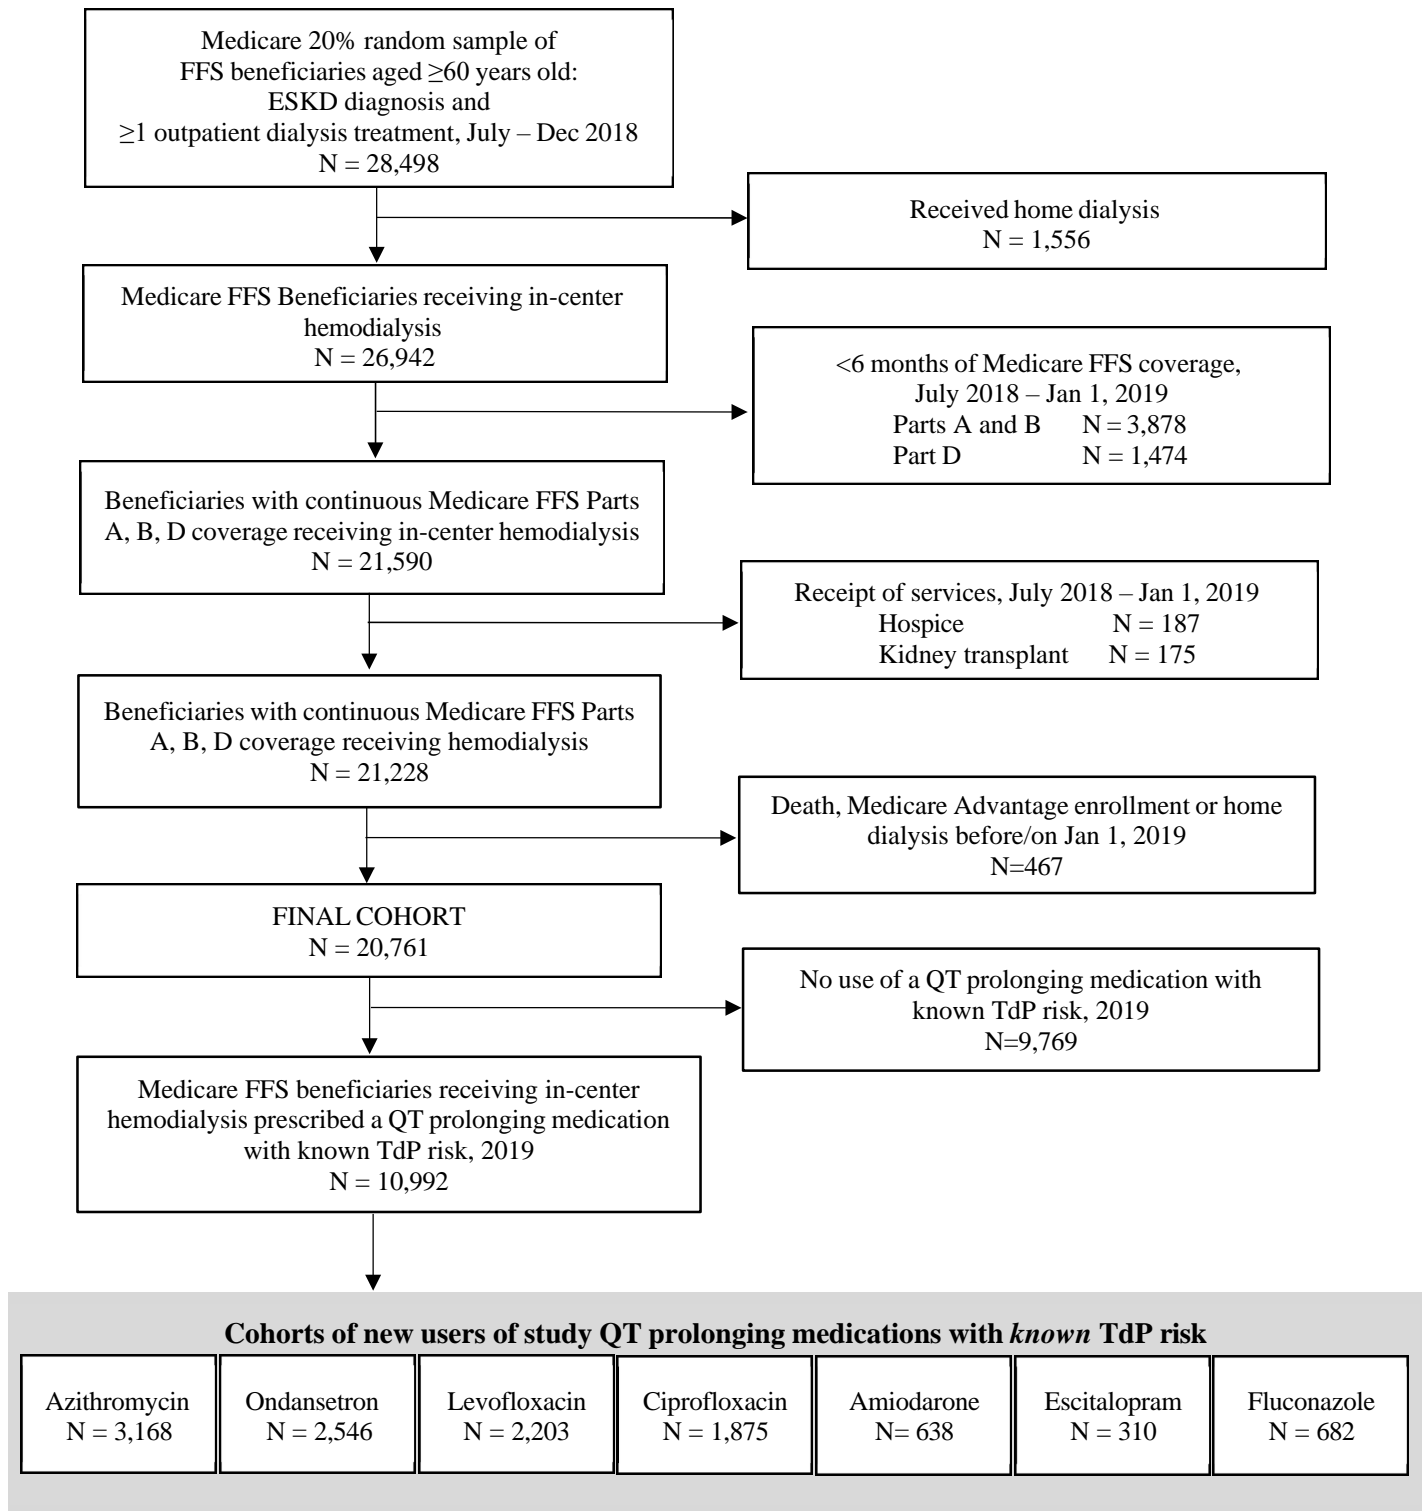

Abbreviations: ESKD, end-stage kidney disease; FFS, fee-for service; TdP, Torsades de Pointes.

**eTable 1.** Data Sources: Diagnosis Codes, Data Files for Social Factors, Comorbid Conditions, and Health Care Utilization

| Variable                                                | Relevant ICD-10 diagnosis codes or claims data (Medicare data source)                                                                                                                                                                                                                                                                                                                                                                                                                                                                                                                        |
|---------------------------------------------------------|----------------------------------------------------------------------------------------------------------------------------------------------------------------------------------------------------------------------------------------------------------------------------------------------------------------------------------------------------------------------------------------------------------------------------------------------------------------------------------------------------------------------------------------------------------------------------------------------|
| <b>Eligibility criteria</b>                             |                                                                                                                                                                                                                                                                                                                                                                                                                                                                                                                                                                                              |
| End-stage kidney disease                                | N18.5, N18.6, N19, Z91.15, Z99.2, Z94.0, I12.0, I13.11, I13.12 (Part A/B claims)                                                                                                                                                                                                                                                                                                                                                                                                                                                                                                             |
| Dialysis procedure codes (including home dialysis)      | CPT: 90935, 90937, 90945, 90947, 90999 (Part B claims)<br>Revenue center: 0820-0889 (Part B claims)                                                                                                                                                                                                                                                                                                                                                                                                                                                                                          |
| Kidney transplant                                       | 0TY00Z0, 0TY00Z1, 0TY00Z2, 0TY10Z0, 0TY10Z1, 0TY10Z2                                                                                                                                                                                                                                                                                                                                                                                                                                                                                                                                         |
| <b>Social factors</b>                                   |                                                                                                                                                                                                                                                                                                                                                                                                                                                                                                                                                                                              |
| Low-income subsidy                                      | cost share group code 01-08                                                                                                                                                                                                                                                                                                                                                                                                                                                                                                                                                                  |
| Alcohol or drug abuse/dependence                        | F10.10, F10.11, F10.120, F10.129, F10.20, F10.21, F10.220, F10.229, F11.10, F11.11, F11.120, F11.129, F11.20–F11.25, F11.28, F11.29, F11.90, F12.10, F12.11, F12.20–F12.25, F12.28, F12.29, F13.10, F13.11, F13.120, F13.20–F13.29, F13.90, F14.10, F14.11, F14.120, F14.20–F14.25, F14.28, F14.29, F14.90, F15.10, F15.11, F15.120, F15.20–F15.25, F15.28, F15.29, F15.90, F16.10, F16.11, F16.120, F16.20–F16.25, F16.28, F16.29, F16.90, F18.10, F18.11, F18.120, F18.20–F18.25, F18.27, F18.28, F18.29, F18.90, F19.10, F19.11, F19.120, F19.20–F19.29, F19.90, F55<br>(Part A/B claims) |
| Tobacco use                                             | F17.200, F17.201, F17.210, F17.211, F17.220, F17.221, F17.290, F17.291 (Part A/B claims)                                                                                                                                                                                                                                                                                                                                                                                                                                                                                                     |
| History of non-compliance                               | Z91.1 (Part A/B claims)                                                                                                                                                                                                                                                                                                                                                                                                                                                                                                                                                                      |
| <b>Comorbid conditions</b>                              |                                                                                                                                                                                                                                                                                                                                                                                                                                                                                                                                                                                              |
| Arrhythmia                                              | I46–I49 (Part A/B claims)                                                                                                                                                                                                                                                                                                                                                                                                                                                                                                                                                                    |
| Conduction disorder                                     | I44–I45 (Part A/B claims)                                                                                                                                                                                                                                                                                                                                                                                                                                                                                                                                                                    |
| Dyslipidemia                                            | E78.0, E78.1, E78.2, E78.4, E78.5 (Part A/B claims)                                                                                                                                                                                                                                                                                                                                                                                                                                                                                                                                          |
| Heart failure                                           | I09.81, I11.0, I13.0, I50 (Part A/B claims)                                                                                                                                                                                                                                                                                                                                                                                                                                                                                                                                                  |
| Hypertension                                            | I10–I16 (Part A/B claims)                                                                                                                                                                                                                                                                                                                                                                                                                                                                                                                                                                    |
| Ischemic heart disease                                  | I20–I25 (Part A/B claims)                                                                                                                                                                                                                                                                                                                                                                                                                                                                                                                                                                    |
| Peripheral arterial disease                             | E10.5, E11.5, E13.5, I70.2–I70.9, I73.1, I73.89, I73.9, I74.3–I74.5, I75.02, I77.72, I79.1, I79.8 (Part A/B claims)                                                                                                                                                                                                                                                                                                                                                                                                                                                                          |
| Stroke                                                  | G45–G46, I60–I69 (Part A/B claims)                                                                                                                                                                                                                                                                                                                                                                                                                                                                                                                                                           |
| Valvular disease                                        | I05–I08, I09.1, I34–I37 (Part A/B claims)                                                                                                                                                                                                                                                                                                                                                                                                                                                                                                                                                    |
| Implantable cardioverter defibrillator                  | Z95.810 (Part A/B claims)                                                                                                                                                                                                                                                                                                                                                                                                                                                                                                                                                                    |
| Cardiac pacemaker                                       | Z95.0 (Part A/B claims)                                                                                                                                                                                                                                                                                                                                                                                                                                                                                                                                                                      |
| Anxiety                                                 | F41, F43.22, F43.23, F93.0 (Part A/B claims)                                                                                                                                                                                                                                                                                                                                                                                                                                                                                                                                                 |
| Depression                                              | F31.30–F31.32, F31.4–F31.6, F31.75–F31.78, F32.0–F32.5, F32.89, F32.9, F33.0–F33.9, F34.1, F43.21, F43.23 (Part A/B claims)                                                                                                                                                                                                                                                                                                                                                                                                                                                                  |
| Diabetes                                                | E10, E11, E13 (Part A/B claims)                                                                                                                                                                                                                                                                                                                                                                                                                                                                                                                                                              |
| Gastrointestinal bleed                                  | K25.0, K25.2, K25.4, K25.6, K26.0, K26.2, K26.4, K26.6, K27.0, K27.2, K27.4, K27.6, K28.0, K28.2, K28.4, K28.6, K55.21, K57.01, K57.11, K57.13, K57.21, K57.31, K57.33, K57.41, K57.51, K57.53, K57.81, K57.91, K57.93, K62.5, K92.0, K92.1, K92.2 (Part A/B claims)                                                                                                                                                                                                                                                                                                                         |
| Gastroesophageal reflux disease                         | K21 (Part A/B claims)                                                                                                                                                                                                                                                                                                                                                                                                                                                                                                                                                                        |
| Peptic ulcer                                            | K27 (Part A/B claims)                                                                                                                                                                                                                                                                                                                                                                                                                                                                                                                                                                        |
| Hypothyroidism                                          | E00, E01.8, E02, E03.0–E03.3, E03.8, E03.9, E89.0 (Part A/B claims)                                                                                                                                                                                                                                                                                                                                                                                                                                                                                                                          |
| Liver disease                                           | K70–K76 (Part A/B claims)                                                                                                                                                                                                                                                                                                                                                                                                                                                                                                                                                                    |
| <b>Health care utilization</b>                          |                                                                                                                                                                                                                                                                                                                                                                                                                                                                                                                                                                                              |
| Hospitalization                                         | Total number of inpatient hospitalizations (discharges based on the DSCHRGDT variable)<br>CLM_TYPE = 60 (Part A Claims, MEDPar files)                                                                                                                                                                                                                                                                                                                                                                                                                                                        |
| <b>Medication use</b>                                   |                                                                                                                                                                                                                                                                                                                                                                                                                                                                                                                                                                                              |
| Any use of prescribed medications                       | (Part D Claims)                                                                                                                                                                                                                                                                                                                                                                                                                                                                                                                                                                              |
| Number of unique prescribers                            | (Part D Claims)                                                                                                                                                                                                                                                                                                                                                                                                                                                                                                                                                                              |
| Use of ≥ 1 medication with <i>known</i> TdP risk*       | See <b>Table S2</b> for relevant medications (Part D Claims)                                                                                                                                                                                                                                                                                                                                                                                                                                                                                                                                 |
| Use of ≥ 1 medication with <i>conditional</i> TdP risk* | See <b>Table S2</b> for relevant medications (Part D Claims)                                                                                                                                                                                                                                                                                                                                                                                                                                                                                                                                 |
| Use of ≥ 1 medication with <i>possible</i> TdP risk*    | See <b>Table S2</b> for relevant medications (Part D Claims)                                                                                                                                                                                                                                                                                                                                                                                                                                                                                                                                 |

Abbreviations: TdP, Torsades de Pointes.

**eTable 2.** List of QT-Prolonging Medications With a Known, Possible, and Conditional Risk of TdP\*

| <b>Known risk of TdP (n=40)</b>                                                                                                                                                                                                                                                                                                                                                                                                                                                                                                                                                                                                                                                                                                                                                                                                                                                                                                                                                                                                                                                                                                                                                                                                                                                                                                                                                                                                                                                                                            |
|----------------------------------------------------------------------------------------------------------------------------------------------------------------------------------------------------------------------------------------------------------------------------------------------------------------------------------------------------------------------------------------------------------------------------------------------------------------------------------------------------------------------------------------------------------------------------------------------------------------------------------------------------------------------------------------------------------------------------------------------------------------------------------------------------------------------------------------------------------------------------------------------------------------------------------------------------------------------------------------------------------------------------------------------------------------------------------------------------------------------------------------------------------------------------------------------------------------------------------------------------------------------------------------------------------------------------------------------------------------------------------------------------------------------------------------------------------------------------------------------------------------------------|
| Amiodarone, anagrelide, arsenic trioxide, azithromycin, cesium chloride, chloroquine, chlorpromazine, cilostazol, ciprofloxacin, citalopram, clarithromycin, cocaine, cisopyramide, dofetilide, donepezil, dronedarone, droperidol, erythromycin, escitalopram, flecainide, fluconazole, haloperidol, hydroxychloroquine, ibutilide, levofloxacin, methadone, mobocertinib, moxifloxacin, ondansetron, oxaliplatin, papaverine, pentamidine, pimozide, procainamide, propofol, quinidine, sevoflurane, sotalol, thioridazine, vandetanib                                                                                                                                                                                                                                                                                                                                                                                                                                                                                                                                                                                                                                                                                                                                                                                                                                                                                                                                                                                   |
| <b>Possible risk of TdP (n=113)</b>                                                                                                                                                                                                                                                                                                                                                                                                                                                                                                                                                                                                                                                                                                                                                                                                                                                                                                                                                                                                                                                                                                                                                                                                                                                                                                                                                                                                                                                                                        |
| Alfuzosin, apalutamide, apomorphine, aripiprazole, artemether/lumefantrine, asenapine, atomoxetine, bedaquiline, bendamustine, bicalutamide, bortezomib, bosutinib, buprenorphine, cabozantinib, capecitabine, ceritinib, clozapine, cobimetinib, crizotinib, dabrafenib, dasantinib, degarelix, desipramine, dextromethorphan/quinidine, dolasteron, efavirenz, eliglustat, encorafenib, entrectinib, epirubicin, eribulin, felbamate, fingolimod, fluorouracil, gemifloxacin, gilteritinib, glasdegib, granisertron, hydrocodone (ER only), iloperidone, imatinib, imipramine, inotuzumab ozogamicin, isradipine, ivosidenib, laoatinib, lefamulin, lenvatinib, leuprolide, levetiracetam, levoketoconazole, lithium, lofexidine, lopinavir/ritonavir, lumateperone, lurasidone, maprotiline, midostaurin, mifepristone, mirabegron, mirtazapine, necitumumab, nifedipine, nilotinib, nortriptyline, nusinersen, ofloxacin, oliceridine, osilordrostat, osimertinib, oxytocin, ozanimod, paliperidone, palonosetron, panobinostat, pasireotide, pazopanib, perflutren, perphenazine, pimavanserin, pitolisant, ponesimod, pretomanid, primaquine, promethazine, relugolix, remimazolam, ribociclib, rilpivirine, romidepsin, rucaparib, saquinavir, selpercantib, Siponimod, sorafenib, sunitinib, tacrolimus, tamoxifen, tazemetostat, telavancin, telithromycin, tetrabenazine, tipiracil/trifluridine, tizanidine, tolterodine, tramadol, trimipramine, valbenazine, vardenafil, vemurafenib, voclosporin, varinostat |
| <b>Conditional risk of TdP (n=48)</b>                                                                                                                                                                                                                                                                                                                                                                                                                                                                                                                                                                                                                                                                                                                                                                                                                                                                                                                                                                                                                                                                                                                                                                                                                                                                                                                                                                                                                                                                                      |
| Abiraterone, amantadine, amisulpride, amitriptyline, amphotericin B, atazanavir, bendroflumethiazide (also called bendrofluazide), chloralhydrate, cimetidine, clomipramine, diltiazem, diphenhydramine, doxepin, esomeprazole, famotidine, fluoxetine, fluvoxamine, furosemide, galantamine, hydrochlorothiazide, hydroxyzine, indapamide, itraconazole, ivabradine, ketoconazole, lansoprazole, loperamide, metoclopramide, metolazone, metronidazole, nelfinavir, olanzapine, omeprazole, pantoprazole, paroxetine, piperacillin/tazobactam, posaconazole, propafenone, quetiapine, quinine, ranolazine, risperidone, sertraline, solifenacin, torsemide, trazodone, voriconazole, ziprasidone                                                                                                                                                                                                                                                                                                                                                                                                                                                                                                                                                                                                                                                                                                                                                                                                                          |

\* Lists of medications were obtained from CredibleMeds. CredibleMeds classifies medications that can prolong the QT interval as having a known, possible, or conditional TdP risk. Drugs with known TdP risk are defined as drugs that prolong the QT interval and are clearly associated with a known risk of TdP, even when taken as recommended. Drugs with possible TdP risk are defined as drugs that can cause QT prolongation but currently lack evidence for a risk of TdP when taken as recommended. Drugs with conditional TdP risk are defined as drugs that are associated with TdP only under certain conditions (e.g., excessive dose, in patients with conditions such as hypokalemia, or when taken with interacting drugs) or drugs that create conditions that facilitate or induce TdP (e.g., cause an electrolyte disturbance that induces TdP). This list of medications was obtained from the CredibleMeds website on 6/3/2022. According to the CredibleMeds website, this specific medication list was last revised on 5/26/2022.

Abbreviations: TdP, Torsades de Pointes.

**eTable 3.** Most Frequent QT-Prolonging Medications With Known TdP Risk Filled in 2019

| Medication         | Any fill in 2019         |              | New fill in 2019         |              |
|--------------------|--------------------------|--------------|--------------------------|--------------|
|                    | N=10,992 patients        |              | N=4,657 patients         |              |
|                    | Unique patients<br>N (%) | Fills<br>(N) | Unique patients<br>N (%) | Fills<br>(N) |
| Azithromycin       | 3,372 (30.7%)            | 4,732        | 1,676 (36.0%)            | 2,161        |
| Ondansetron        | 3,364 (30.6%)            | 8,569        | 1,228 (26.4%)            | 2,087        |
| Levofloxacin       | 2,353 (21.4%)            | 3,358        | 1,109 (23.8%)            | 1,470        |
| Ciprofloxacin      | 2,118 (19.3%)            | 3,245        | 992 (21.3%)              | 1,347        |
| Amiodarone         | 1,618 (14.7%)            | 6,844        | 352 (7.6%)               | 1,047        |
| Escitalopram       | 990 (9.0%)               | 5,338        | 146 (3.1%)               | 459          |
| Fluconazole        | 869 (7.9%)               | 1,587        | 343 (7.4%)               | 581          |
| Donepezil          | 732 (6.7%)               | 4,410        | 134 (2.9%)               | 520          |
| Citalopram         | 720 (6.6%)               | 3,944        | 82 (1.8%)                | 273          |
| Cilostazol         | 228 (2.1%)               | 937          | 57 (1.2%)                | 161          |
| Clarithromycin     | 97 (0.9%)                | 103          | 56 (1.2%)                | 59           |
| Hydroxychloroquine | 93 (0.8%)                | 477          | SC                       | 26           |
| Haloperidol        | 85 (0.8%)                | 306          | 21 (0.5%)                | 30           |
| Dronedaron         | 60 (0.5%)                | 338          | 10 (0.2%)                | 29           |
| Moxifloxacin       | 55 (0.5%)                | 71           | 32 (0.7%)                | 43           |
| Methadone          | 50 (0.5%)                | 362          | 10 (0.2%)                | 39           |
| Chlorpromazine     | 42 (0.4%)                | 155          | 11 (0.2%)                | 24           |
| Sotalol            | 28 (0.3%)                | 138          | SC                       | 44           |
| Erythromycin       | 24 (0.2%)                | 64           | SC                       | SC           |
| Flecainide         | 23 (0.2%)                | 89           | SC                       | 13           |

Abbreviations: TdP, Torsades de Pointes.

**eTable 4.** Medications in CYP Inhibitor Classes

| <b>Class</b>       | <b>Medications</b>                                                                                                                                                                                                                                                                                                                                                                                                            |
|--------------------|-------------------------------------------------------------------------------------------------------------------------------------------------------------------------------------------------------------------------------------------------------------------------------------------------------------------------------------------------------------------------------------------------------------------------------|
| CYP3A4 inhibitors  | amprenavir, aprepitant, atazanavir, atazanavir/ ritonavir, berotralstat, casopitant, cimetidine, ciprofloxacin, crizotinib, darunavir, darunavir/ritonavir, diltiazem, dronedarone, duvelisib, erythromycin, faldaprevir, fedratinib, fluconazole, imatinib, ipatasertib, isavuconazole, istradefylline, lefamulin, letermovir, netupitant, nilotinib, ravuconazole, schisandra sphenanthera, tofisopam, verapamil, voxelotor |
| CYP2C19 inhibitors | Ticlopidine, cannabidiol, efavirenz, etravirine, fedratinib, fexinidazole, moclobemide, stiripentol, triclabendazole, voriconazole, omeprazole, esomeprazole, pantoprazole, lansoprazole, dexlansoprazole, and rabeprazole                                                                                                                                                                                                    |

Abbreviations: CYP, cytochrome p450.

**eTable 5.** QT-Prolonging Medication Use in 2019

|                                                                                  | Overall                     | Existing users of QT<br>prolonging<br>medications with<br><i>known</i> TdP risk | New users of QT<br>prolonging<br>medications with<br><i>known</i> TdP risk |
|----------------------------------------------------------------------------------|-----------------------------|---------------------------------------------------------------------------------|----------------------------------------------------------------------------|
| N                                                                                | 10,992                      | 6,335 (57.6%)                                                                   | 4,657 (42.4%)                                                              |
| QT prolonging medication fills in 2019, mean $\pm$ SD; median [Q1-Q3]            |                             |                                                                                 |                                                                            |
| Any TdP risk                                                                     | 12.7 $\pm$ 14.0<br>9 [4-16] | 14.8 $\pm$ 15.5<br>11 [6-19]                                                    | 9.7 $\pm$ 11.0<br>7 [3-13]                                                 |
| Known TdP risk                                                                   | 4.1 $\pm$ 5.1<br>2 [1-5]    | 5.5 $\pm$ 6.1<br>4 [2-7]                                                        | 2.2 $\pm$ 2.1<br>1 [1-3]                                                   |
| Conditional TdP risk                                                             | 6.7 $\pm$ 9.4<br>4 [1-9]    | 7.3 $\pm$ 10.0<br>5 [1-10]                                                      | 5.9 $\pm$ 8.5<br>4 [0-8]                                                   |
| Possible TdP risk                                                                | 1.8 $\pm$ 4.6<br>0 [0-1]    | 2.0 $\pm$ 5.0<br>0 [0-2]                                                        | 1.5 $\pm$ 4.1<br>0 [0-1]                                                   |
| Types of QT prolonging medications filled in 2019, mean $\pm$ SD; median [Q1-Q3] |                             |                                                                                 |                                                                            |
| Any TdP risk                                                                     | 3.5 $\pm$ 1.8<br>3 [2-5]    | 3.7 $\pm$ 1.9<br>3 [2-5]                                                        | 3.1 $\pm$ 1.7<br>3 [2-4]                                                   |
| Known TdP risk                                                                   | 1.5 $\pm$ 0.8<br>1 [1-2]    | 1.7 $\pm$ 0.9<br>1 [1-2]                                                        | 1.3 $\pm$ 0.6<br>1 [1-2]                                                   |
| Conditional TdP risk                                                             | 1.5 $\pm$ 1.2<br>1 [1-2]    | 1.6 $\pm$ 1.3<br>1 [1-2]                                                        | 1.4 $\pm$ 1.2<br>1 [0-2]                                                   |
| Possible TdP risk                                                                | 0.4 $\pm$ 0.6<br>0 [0-1]    | 0.5 $\pm$ 0.7<br>0 [0-1]                                                        | 0.4 $\pm$ 0.6<br>0 [0-1]                                                   |

Abbreviations: SD, standard deviation; Q, quartile; TdP, Torsades de Pointes.

**eTable 6.** Pharmacy and Prescriber Characteristics of the Most Common Study Pharmacokinetic Medications Interacting With New-Use Escitalopram in 2019<sup>a</sup>

|                                         | Escitalopram new-use (N=310) |                   |
|-----------------------------------------|------------------------------|-------------------|
|                                         | CYP2C19 inhibitors           | CYP3A4 inhibitors |
| <b>Concurrent use, N (%)</b>            | <b>115 (37.1%)</b>           | <b>19 (6.1%)</b>  |
| <b>Different Pharmacies, N (%)</b>      | 17 (20.1%)                   | 3 (15.8%)         |
| <b>Same Pharmacy, N (%)</b>             | 150 (89.8%)                  | 16 (84.2%)        |
| Commercial/ Retail                      | 112 (67.1%)                  | 14 (73.7%)        |
| Institutional (Long-term care facility) | 36 (21.6%)                   | SC                |
| Other                                   | SC                           | SC                |
| Mail order                              | SC                           | SC                |
| <b>Different Prescribers, N (%)</b>     | 89 (53.3%)                   | 15 (78.9%)        |
| <b>Same Prescriber, N (%)</b>           | 78 (46.7%)                   | 4 (21.1%)         |
| General Medicine <sup>b</sup>           | 56 (33.5%)                   | SC                |
| Nephrology                              | SC                           | SC                |
| Other <sup>b</sup>                      | NR                           | SC                |

Note: Bolded sample (N) describing new-use of escitalopram and concurrent use of select CYP inhibitors serves as the denominator for the pharmacy and prescriber statistics below. The table reports small cell sizes <11 and selected cell sizes n=11-30 (“non-reported”) for data that may be identifiable, as per CMS data use reporting requirements.

<sup>a</sup> Lists of medications falling into the CYP2C19 and CYP3A4 inhibitor categories are provided in **eTable 4**. Escitalopram was selected as the exemplar new-use QT-prolonging medication because of its status as a major substrate of CYP2C19 and CYP3A4, for which concurrent use of a CYP2C19 or CYP3A4 inhibitor(s) could inhibit escitalopram’s metabolism and result in accumulation and an increased risk of adverse events.

<sup>b</sup> General Medicine includes Internal Medicine, Family Medicine, and General Practice. Other prescribers include Emergency Medicine, Cardiology, Infectious Diseases, Hospitalist Medicine, Psychiatry, Surgery, Medical Genetics, Allergy, Immunology, Podiatry, Physical Medicine and Rehabilitation, Otolaryngology, Dentistry, Dermatology, Radiology, Legal Medicine, Neuromusculoskeletal Medicine, Nuclear Medicine, Optometry, and Pathology.

Abbreviations: CMS, Centers for Medicare and Medicaid Services; CYP, cytochrome p450; NR, non-reported; SC: small cell size.
