# Supplementary material for: Prescription and Dispensation of QT-Prolonging Medications in Individuals Receiving Hemodialysis
Source: PubMed Central journal article supplement (PMC11061769; doi:10.1001/jamanetworkopen.2024.8732), 2024-04-30
Supplement: jamanetwopen-e248732-s002.pdf [file jamanetwopen-e248732-s002.pdf]

## Data Sharing Statement

Wang. Prescription and Dispensation of QT-Prolonging Medications in Individuals Receiving Hemodialysis. *JAMA Netw Open*. Published April 29, 2024.

doi:10.1001/jamanetworkopen.2024.8732

### Data

**Data available:** No

### Additional Information

**Explanation for why data not available:** The data used in this study are publicly available from CMS with the execution of a data use agreement.
